# Supplementary material for: Altitudinal Heterogeneity of UV Adaptation in Phytophthora infestans Is Associated with the Spatial Distribution of a DNA Repair Gene
Source: MDPI journal article supplement (doi:10.3390/jof7040245), 2021-03-24
Supplement: s1 [file s1]

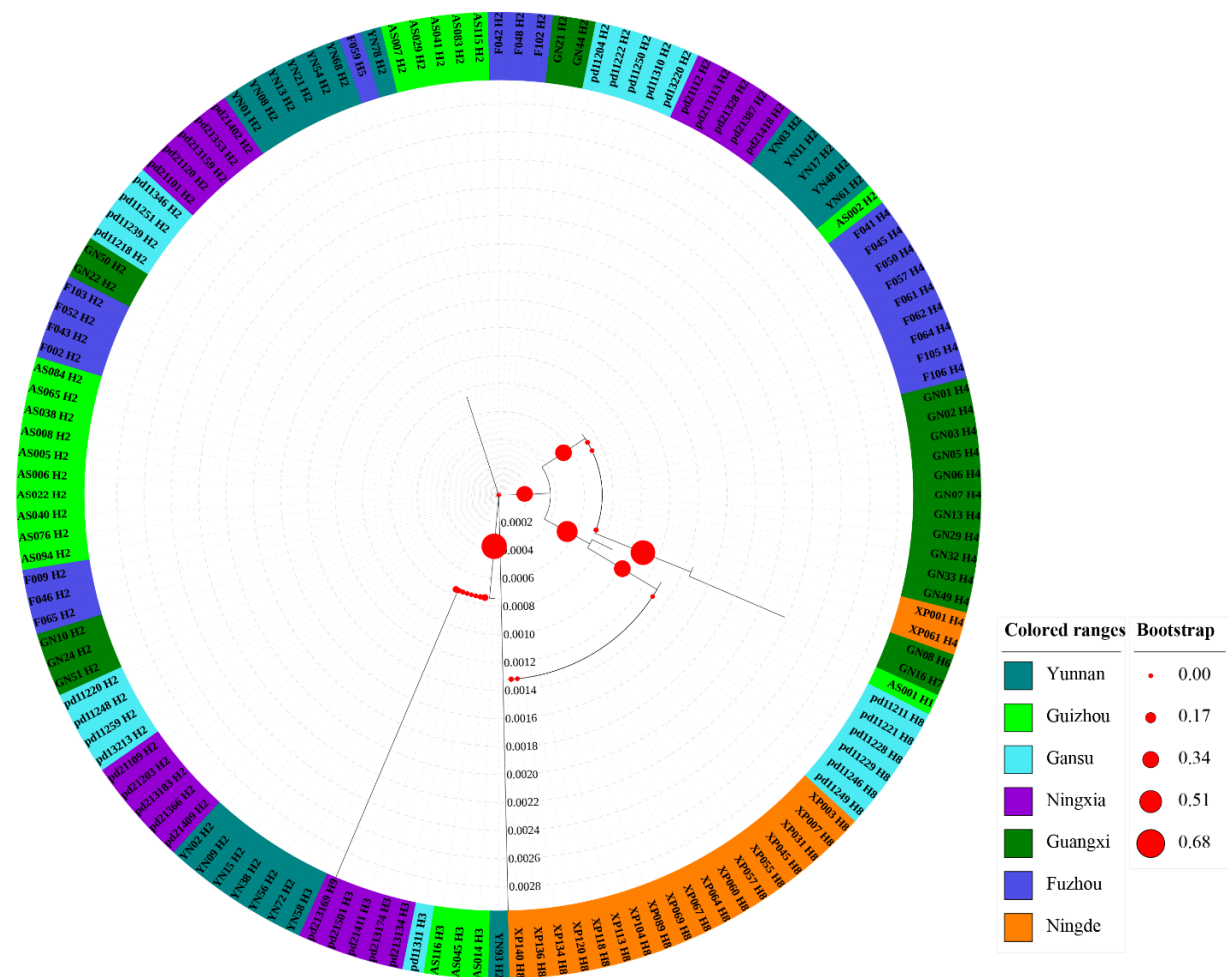

**Figure S1.** The phylogenetic tree of *Phytophthora infestans* RAD23 sequences was reconstructed using a Neighbor-joining (NJ) approach embedded in the MEGA 7.0.21 program and displayed and annotated using the online tool Interactive Tree of Life (<https://itol.embl.de/>). The bootstrap values were calculated from 1,000 replications and are represented by red circles at the middle of the tree graph.
